# Supplementary material
Source: PubMed Central journal article supplement (PMC7960076)
Supplement: 15-01385.pdf [file 15-01385.pdf]

**On-line Table: Clinical features in patients with zoster-associated plexopathy**

| Patient | Age (yr), Sex | Rash Distribution     | Electrodiagnostic Findings                                                                                                                                                                                     | Clinical Diagnosis                                       | Interval between Weakness and Imaging (days) | Imaging Study Performed | Summary of Findings                                                                                                                                                                                      |
|---------|---------------|-----------------------|----------------------------------------------------------------------------------------------------------------------------------------------------------------------------------------------------------------|----------------------------------------------------------|----------------------------------------------|-------------------------|----------------------------------------------------------------------------------------------------------------------------------------------------------------------------------------------------------|
| 1       | 71, M         | Right upper extremity | Low-amplitude ulnar CMAP<br>Low-amplitude ulnar SNAP; fibrillation potentials and reduced recruitment of large MUPs in lower trunk–innervated muscles                                                          | Mild right lower trunk brachial plexopathy               | 215                                          | Brachial plexus MRI     | Enlargement of the right C8 nerve root extending to the posterior cord; denervation changes seen with increased T2 signal in the infraspinatus                                                           |
| 2       | 77, M         | Left C5/6 dermatomes  | Low-amplitude median CMAP<br>Absent median and lateral antebrachial SNAPs; fibrillation potentials and reduced recruitment of MUPs in most upper limb muscles                                                  | Moderate left pan-brachial plexopathy                    | 23                                           | Brachial plexus MRI     | Increased T2 signal and enlargement of the entire left brachial plexus, most marked in the upper trunk, lateral cord, and posterior cord; denervation changes throughout supraspinatus and infraspinatus |
| 3       | 86, F         | Right C6/7 dermatomes | Low-amplitude ulnar CMAP<br>Low-amplitude median and radial and absent ulnar SNAPs; fibrillation potentials and reduced recruitment of large MUPs in most upper limb muscles                                   | Moderate right pan-brachial plexopathy                   | 41                                           | Brachial plexus MRI     | Increased T2 signal without enhancement of the entire left brachial plexus; atrophy and increased T2 signal in teres minor                                                                               |
| 4       | 77, M         | Left C2–5 dermatomes  | Low-amplitude upper limb CMAPs<br>Fibrillation potentials and reduced recruitment of large MUPs in lower trunk–innervated muscles                                                                              | Moderate left lower trunk brachial plexopathy            | 41                                           | Brachial plexus MRI     | Negative MRI and PET findings                                                                                                                                                                            |
| 5       | 68, M         | Left C6–8 dermatomes  | Low-amplitude ulnar CMAP<br>Absent ulnar and medial antebrachial SNAPs; fibrillation potentials and reduced recruitment of large MUPs in most upper limb muscles, worst in those innervated by the lower trunk | Moderate left lower trunk brachial plexopathy            | 132                                          | Brachial plexus MRI     | Negative MRI findings                                                                                                                                                                                    |
| 6       | 75, M         | Left C6/7 dermatomes  | Low-amplitude median and ulnar CMAPs<br>Absent median and radial SNAPs; fibrillation potentials and reduced recruitment of MUPs in most upper limb muscles                                                     | Severe left pan-brachial plexopathy                      | 77                                           | Brachial plexus MRI     | Increased T2 signal without enhancement of the entire left brachial plexus; denervation changes in infraspinatus, supraspinatus, and deltoid                                                             |
| 7       | 84, M         | Right C5 dermatome    | Low-amplitude median CMAP<br>Absent lateral antebrachial SNAP; fibrillation potentials and no MUPs under voluntary control in upper trunk–innervated muscles                                                   | Severe right upper trunk brachial plexopathy             | 43                                           | Brachial plexus MRI     | Normal brachial plexus but denervation changes in supraspinatus, infraspinatus, and subscapularis                                                                                                        |
| 8       | 63, M         | Left L5 dermatome     | Low-amplitude peroneal CMAP<br>Low-amplitude sural and absent superficial peroneal SNAPs; fibrillation potentials and reduced recruitment of large MUPs in all lower limb muscles                              | Moderate left lumbosacral plexopathy                     | 55                                           | Lumbosacral plexus MRI  | Negative MRI findings                                                                                                                                                                                    |
| 9       | 54, F         | Left C4/5 dermatomes  | Absent lateral antebrachial cutaneous SNAP<br>Fibrillation potentials and reduced recruitment of MUPs in upper and middle trunk–innervated muscles                                                             | Moderate left upper and middle trunk brachial plexopathy | 7                                            | Brachial plexus MRI     | Mild increased T2, most prominent in the posterior cord without enhancement; changes of polymyositis present                                                                                             |
| 10      | 70, F         | Right L3–4 dermatomes | Low-amplitude tibial CMAP<br>Fibrillation potentials and reduced recruitment of MUPs in L3–4–innervated muscles, sparing paraspinals                                                                           | Moderate right lumbosacral plexopathy                    | 37                                           | Lumbosacral plexus MRI  | Increased T2 in the right lumbar plexus and femoral nerve                                                                                                                                                |

**Note:**—CMAP indicates compound muscle action potential; MUP, motor unit potentials; SNAP, sensory nerve action potential.
